# Supplementary material
Source: PubMed Central journal article supplement (PMC2877931)

## Supplemental Figure legends

**Supplemental Figure 1** Macrophage infiltration and myofibroblast accumulation. (A) Immunostaining for Mac3 in the infarct area of EPO- and saline (control)- treated hearts 14d after MI. Scale bars, 100 $\mu$ m. The number of Mac3-positive cells in the ischemic area was measured (n=4). \* $P < 0.05$ . (B) Immunostaining for  $\alpha$ SMA (brown) of EPO- and saline (control)- treated hearts 14 d after MI. Scale bars, 100 $\mu$ m. The number of  $\alpha$ SMA-positive cells in the ischemic area was measured (n=4). \* $P < 0.05$ .

**Supplemental Figure 2** EPO activates the EPO-EPOR signaling pathways in cardiomyocytes. Western blotting of phospholylated Akt and ERK in the cardiomyocytes after EPO treatment. (A) Time dependency (EPO 100 U/ml). (B) Dose dependency (EPO 15 min stimulation). Insulin (1 mU/ml)-treated cardiomyocytes were used as a positive control. (C) Cardiomyocytes were infected with adenoviral vectors encoding dominant negative form of EPOR or LacZ at 10 MOI and treated with or without EPO (100 U/ml) for 15 min. (D) Detection of apoptotic cardiomyocytes using FITC-labeled TUNEL staining. PI3K inhibitor LY294002 (LY, 5  $\mu$ M) and MEK inhibitor PD98059 (PD, 10 $\mu$ M) were added 15 min before EPO administration. The TUNEL-positive cardiomyocytes were counted (n = 6). \* $P < 0.05$ , # $P < 0.01$ . (E) The expression of cleaved caspase-3 at 24 h after H<sub>2</sub>O<sub>2</sub> treatment was analyzed by western blotting. Representative results from three experiments are shown.

**Supplemental Figure 3** The size of cardiomyocytes after MI. The cross-sectional

area of cardiomyocytes in the border area (MI group) or LV free wall (sham group) of EPO- and saline (control)-treated hearts was measured at 14 d after operation (n = 5).

**Supplemental Figure 4** The VEGF and Shh knockdown in cardiomyocytes reduces the EPO-induced angiogenic effect. Endothelial cell proliferation assay was examined using BrdU incorporation (n = 5 per condition). HUVECs were treated with EPO-pretreated conditioned medium (pre-EPO) or saline-pretreated medium (control). siRNA targeting VEGF (**A**), Shh (**B**) or control RNA was introduced into cardiomyocytes followed by EPO-treatment for 48 h. Control is a commercially available negative control RNA. \* $P < 0.05$ .

**Supplemental Figure 5** The Shh expression in infarcted hearts. Representative western blots of Shh-N in the hearts from WT and RES mice at 4 d after MI are shown (n = 4).

**Supplemental Figure 6** STAT3 is not involved in the protective effects of EPO. (**A**) Masson trichrome staining of WT and dnSTAT3-Tg hearts. \* $P < 0.05$  (n=8-9) (**B**) TUNEL staining. EPO prevented H<sub>2</sub>O<sub>2</sub>-induced apoptotic death in dnSTAT3-infected cardiomyocytes as equally as LacZ-infected. Quantitative analysis of TUNEL-positive cells (%) was performed (n=5). \* $P < 0.05$

# Supplemental Figure 1

## A

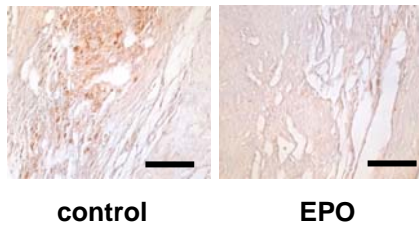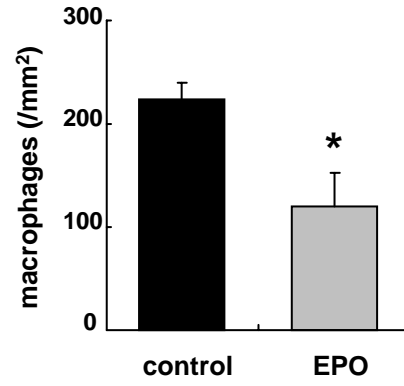

## B

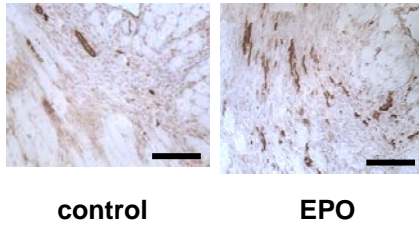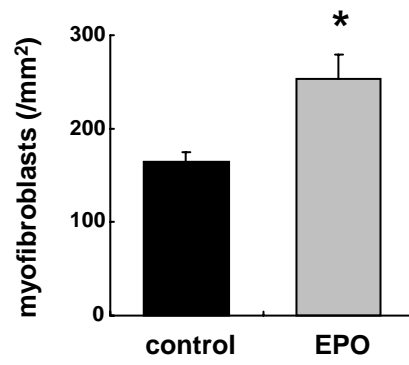

# Supplemental Figure 2

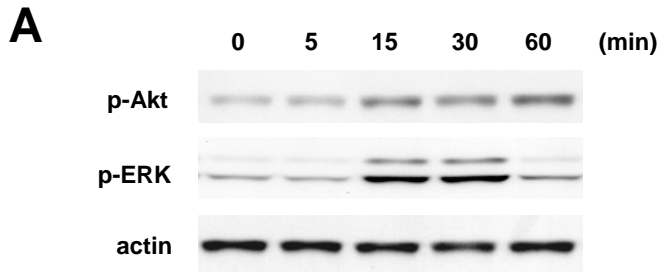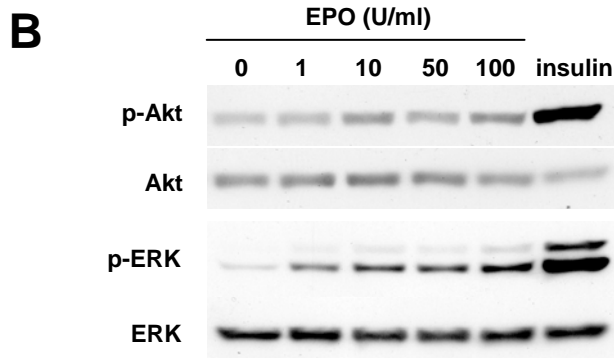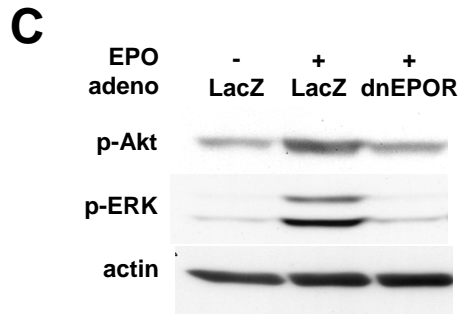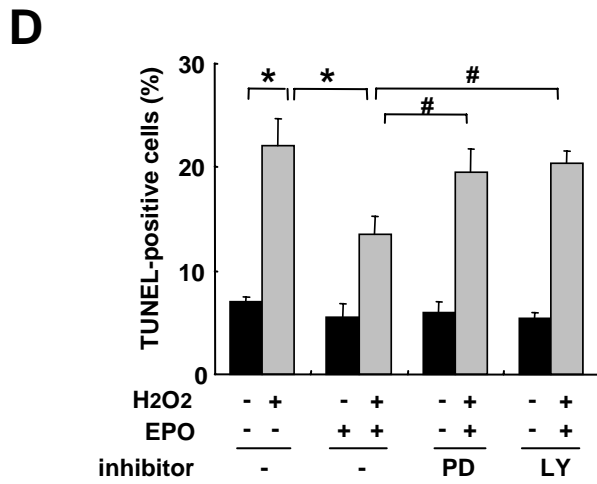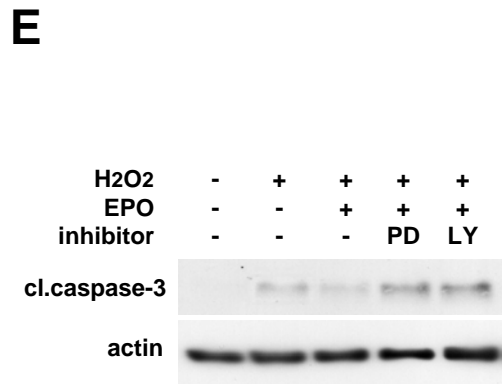

### Supplemental Figure 3

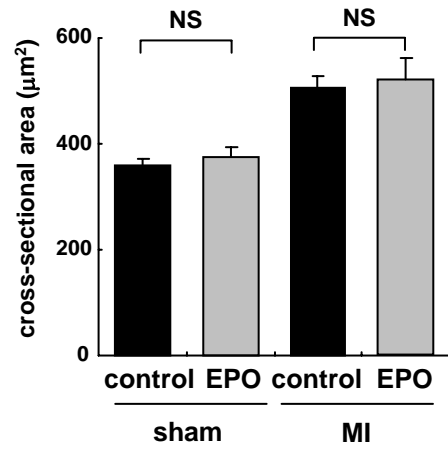

# Supplemental Figure 4

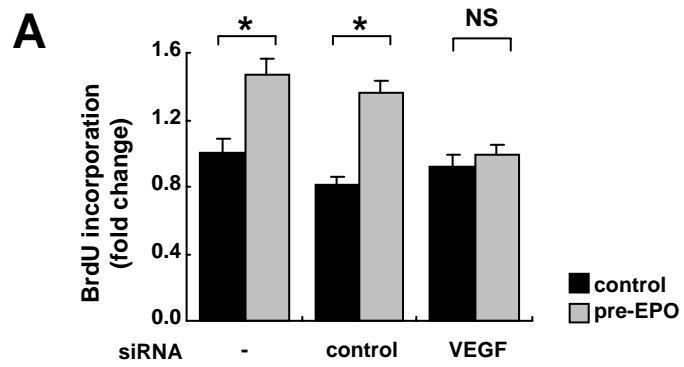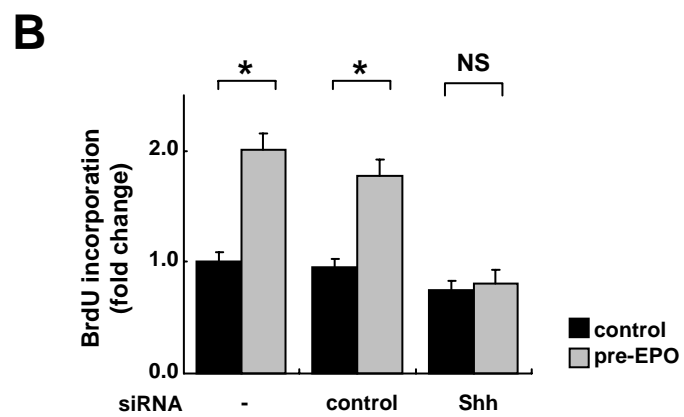

**Supplemental Figure 5**

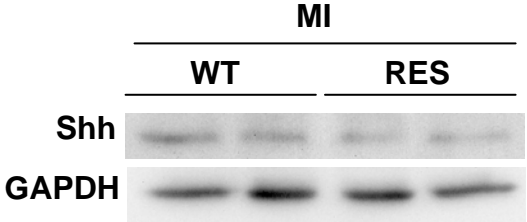

# Supplemental Figure 6

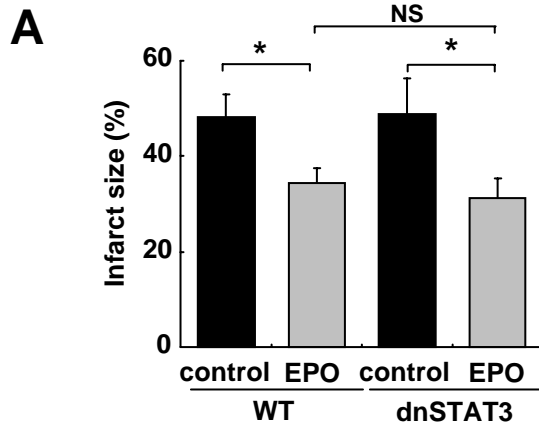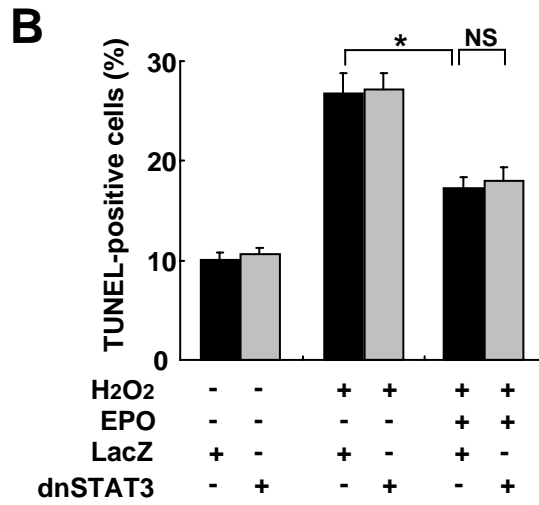

Supplement: JCI39896sd.pdf [file JCI39896sd.pdf]
